# Supplementary material
Source: PubMed Central journal article supplement (PMC8713678)
Supplement: boe-12-12-7544-s001.pdf [file boe-12-12-7544-s001.pdf]

## **Effect of NIR light on the permeability of the blood-brain barriers in *in vitro* models: supplement**

**TING ZHOU,<sup>1</sup> TYMISH Y. OHULCHANSKY,<sup>1,2</sup> AND JUNLE QU<sup>1,3</sup>**

<sup>1</sup>*Key Laboratory of Optoelectronic Devices and Systems of Ministry of Education and Guangdong Province, College of Physics and Optoelectronic Engineering, Shenzhen University, Shenzhen 518060, China*

<sup>2</sup>*tyo@szu.edu.cn*

<sup>3</sup>*jlqu@szu.edu.cn*

---

This supplement published with Optica Publishing Group on 12 November 2021 by The Authors under the terms of the [Creative Commons Attribution 4.0 License](https://creativecommons.org/licenses/by/4.0/) in the format provided by the authors and unedited. Further distribution of this work must maintain attribution to the author(s) and the published article's title, journal citation, and DOI.

Supplement DOI: <https://doi.org/10.6084/m9.figshare.16955425>

Parent Article DOI: <https://doi.org/10.1364/BOE.438445>

# Effect of NIR light on the permeability of the blood-brain barriers *in vitro* models: supplemental document

TING ZHOU,<sup>1</sup> TYMISH Y. OHULCHANSKY,<sup>1,\*</sup> AND JUNLE QU<sup>1,\*</sup>

<sup>1</sup> Key Laboratory of Optoelectronic Devices and Systems of Ministry of Education and Guangdong Province, College of Physics and Optoelectronic Engineering, Shenzhen University, Shenzhen 518060, P. R. China

\* [tyo@szu.edu.cn](mailto:tyo@szu.edu.cn), [jlqu@szu.edu.cn](mailto:jlqu@szu.edu.cn)

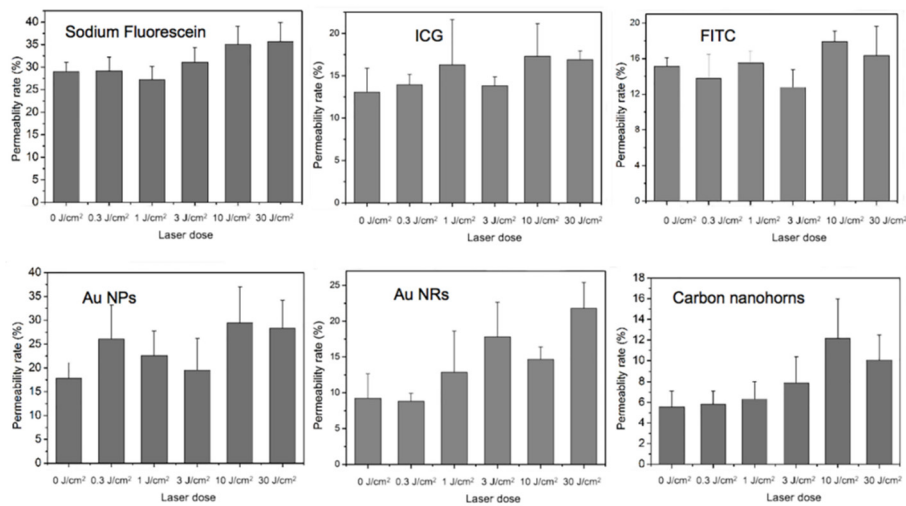

Fig. S1. Permeability of the *in vitro* BBB models for various compounds and nanoparticles after the irradiation.

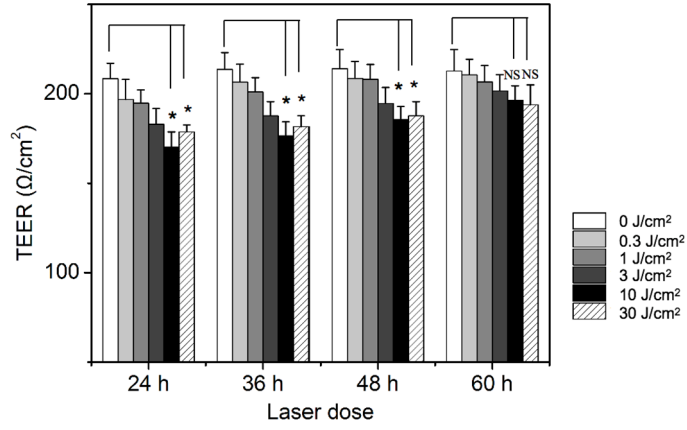

Fig. S2. The TEER of the BBB *in vitro* models after irradiation with various laser doses. NS, not significant; \* $P < 0.05$  versus the untreated group (0  $\text{J}/\text{cm}^2$ ). Error bars indicate means  $\pm$  standard deviation (n=5).

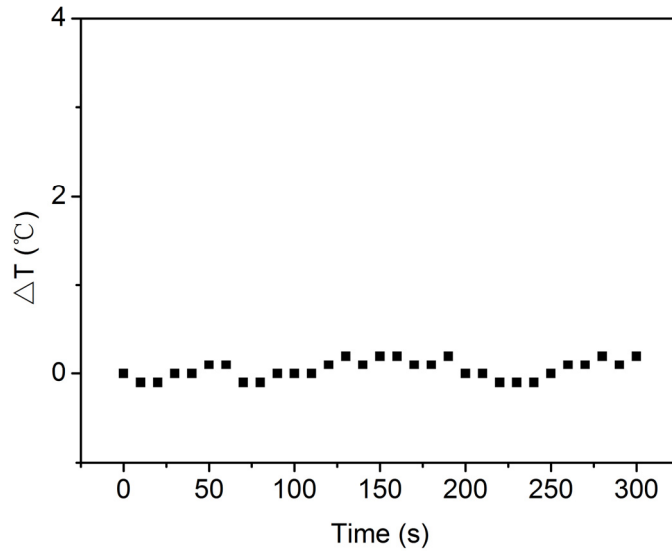

Figure R3. Temperature change in cell medium during the irradiation of a 980 nm laser at a power density of 100  $\text{mW}/\text{cm}^2$ .

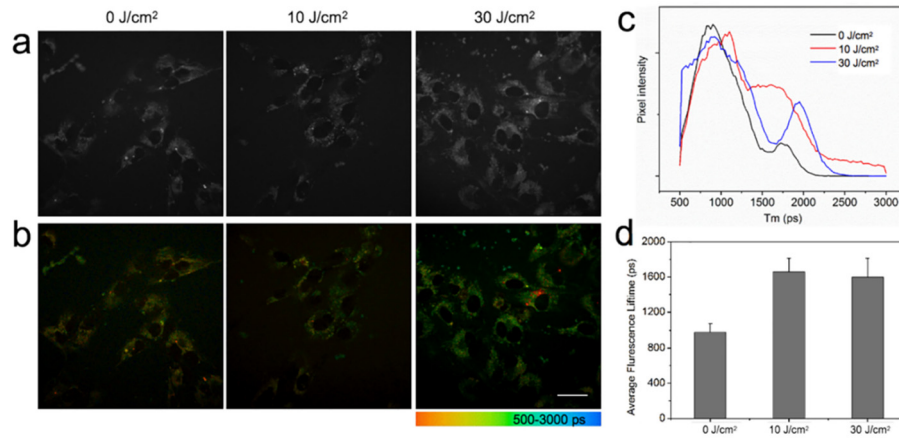

Fig. S4. Mitochondrial activity of brain vessel endothelial cells after PBM treatment analyzed by FLIM. Scale bar=20  $\mu$ m.

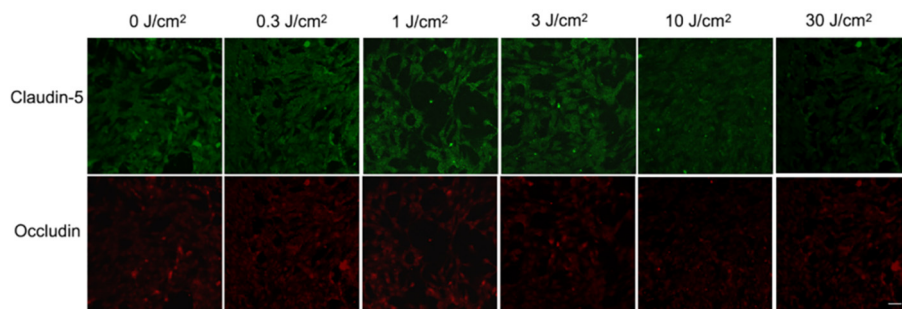

Fig. S5. The expression of tight junction proteins (Claudin-5 and Occludin) on the BBB models after PBM treatment. Scale bar=20  $\mu$ m.
